# Supplementary material for: Tuning in optoelectronic properties of In/Te bilayer heterostructure upon annealing at different temperatures: surface wettability and photo response study for photonic and solar cell applications
Source: Royal Society of Chemistry journal article supplement (doi:10.1039/d4ra00807c), 2024-01-01
Supplement: d4ra00807c1.pdf [file d4ra00807c1.pdf]

Supporting Information

**Tuning in optoelectronic properties of In/Te bilayer heterostructure upon annealing at different temperatures: Surface wettability and photo response study for photonic and solar cell applications**

P. Priyadarshini<sup>1</sup>, Prabhukrupa C. Kumar<sup>1</sup>, Ramakanta Naik<sup>1\*</sup>

<sup>1</sup>*Department of Engineering and Materials Physics, ICT-IOC, Bhubaneswar, 751013, India*

*Corresponding author: [ramakanta.naik@gmail.com](mailto:ramakanta.naik@gmail.com)*

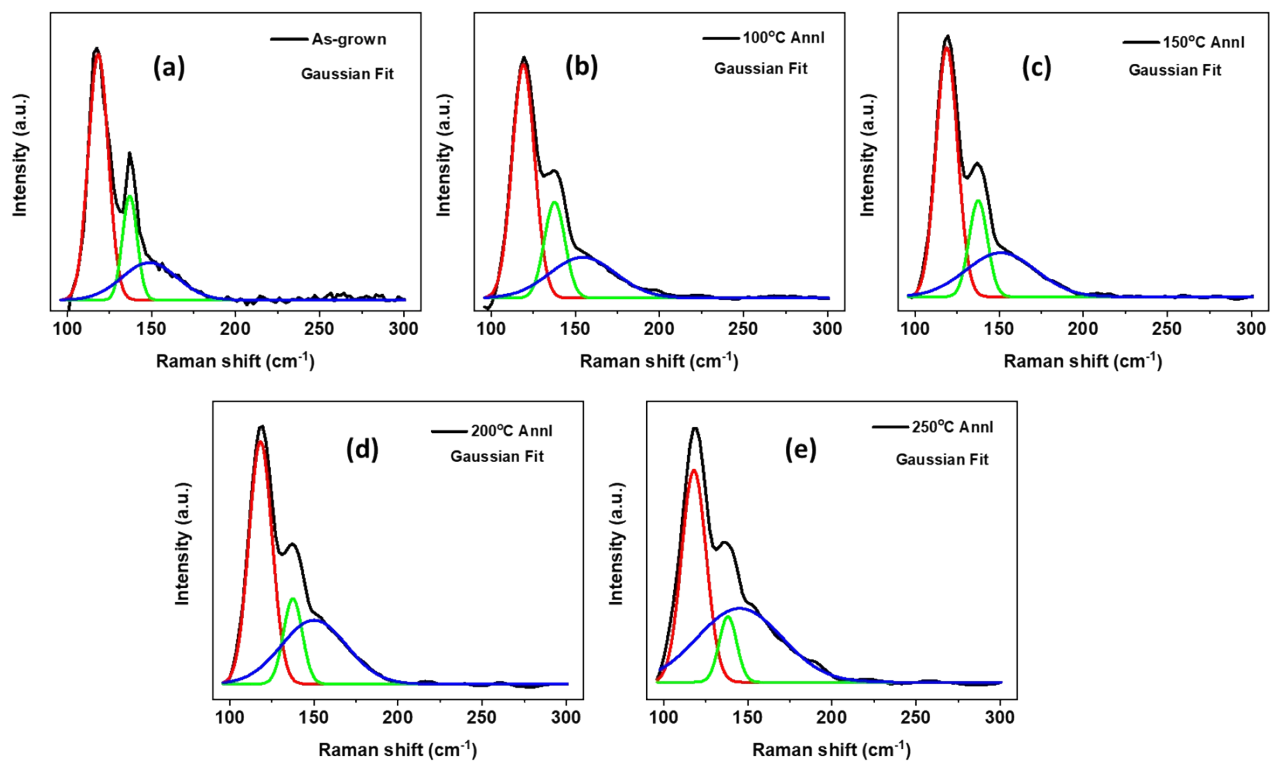

**Fig. S1.** Gaussian fit of Raman peaks for all the thin film samples

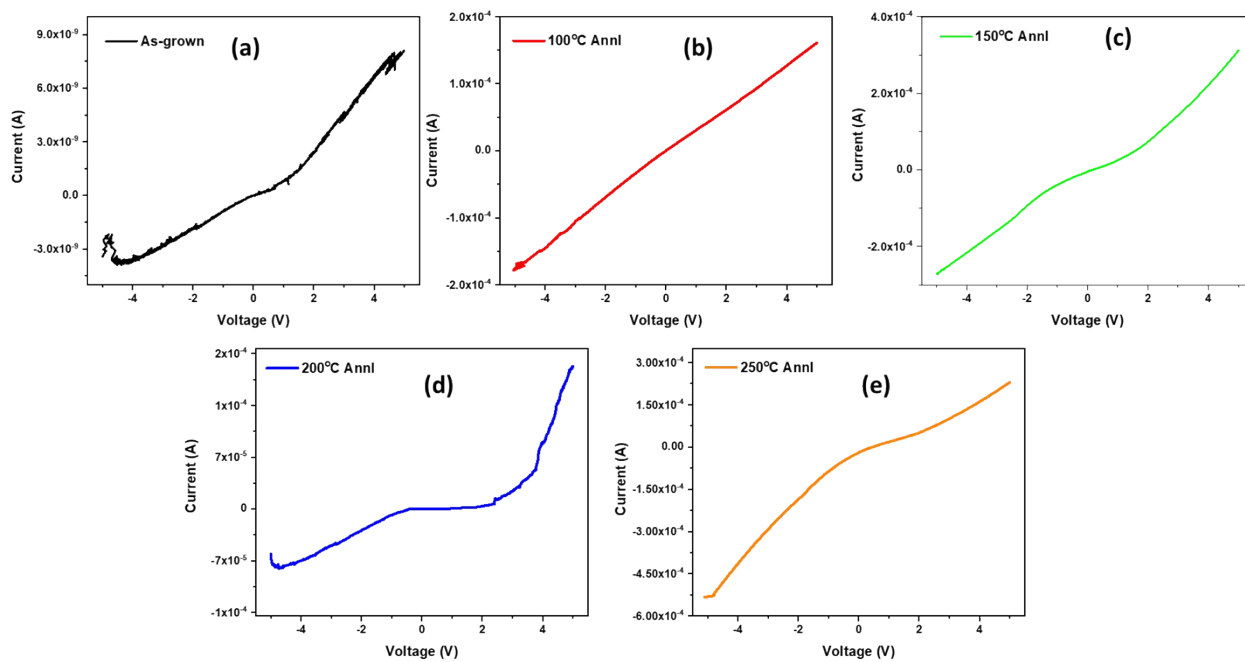

**Fig. S2.** Repeated current-voltage variation graph of thin film samples with the proper experimental setup.
